# Supplementary material for: An efficient Potato virus X -based microRNA silencing in Nicotiana benthamiana
Source: PubMed Central journal article supplement (PMC4738334; doi:10.1038/srep20573), 2016-02-03
Supplement: srep20573-s1.pdf [file srep20573-s1.pdf]

## Efficient *Potato virus X* -based microRNA silencing in *Nicotiana benthamiana*

Jinping Zhao <sup>a, b, #, \*</sup>, Qingtao Liu <sup>a, #</sup>, Pu Hu <sup>a</sup>, Qi Jia <sup>a</sup>, Na Liu <sup>a</sup>, Kangquan Yin <sup>a</sup>, Ye Cheng <sup>b</sup>, Fei Yan <sup>b</sup>, Jianping Chen <sup>b</sup>, Yule Liu <sup>a, \*</sup>

<sup>a</sup> Center for Plant Biology, MOE Key Laboratory of Bioinformatics, School of Life Sciences, Tsinghua University, Beijing 100084, China

<sup>b</sup> The State Key Laboratory Breeding Base for Sustainable control of Pest and Disease, China; Key Laboratory of Biotechnology in Plant Protection of MOA of China and Zhejiang Province, Institute of Virology and Biotechnology, Zhejiang Academy of Agricultural Sciences, Hangzhou 310021, China

<sup>#</sup> These authors contributed equally to this work

### \* Corresponding authors:

|           |                                                                                |
|-----------|--------------------------------------------------------------------------------|
| Name      | Yule Liu                                                                       |
| Telephone | +86-10-62794013                                                                |
| Fax       | +86-10-62794013                                                                |
| E-mail    | <a href="mailto:yuleliu@mail.tsinghua.edu.cn">yuleliu@mail.tsinghua.edu.cn</a> |

|           |                                                              |
|-----------|--------------------------------------------------------------|
| Name      | Jinping Zhao                                                 |
| Telephone | +86-571-86416069                                             |
| Fax       | +86-571-8616069                                              |
| E-mail    | <a href="mailto:jinpingzhao@sina.cn">jinpingzhao@sina.cn</a> |

**Supplementary Table S1.** Primers Used in Vector Construction and PCR Analysis.

| <b>Primer ID</b>               | <b>Primer Sequence (5'-3')</b>                                       | <b>Brief Description</b>         |
|--------------------------------|----------------------------------------------------------------------|----------------------------------|
| Stem-loop 165/166 <sup>c</sup> | GTCTCCTCTGGTGCAGGGTCCGAGGTATTC<br>GCACCAGAGGAGAC <u>gGGGGAATGAAG</u> | For stem-loop RT of miR165/166   |
| miR165/166 FP <sup>b</sup>     | CGGC <u>TCGGACCAGGCTT</u>                                            | For miR165/166 Real time PCR     |
| Stem miR165/166 RP             | GTGCAGGGTCCGAGGT                                                     | For miR165/166 Real time PCR     |
| STTM 165/166 FP <sup>a</sup>   | <u>CgACgACAAgACCgTGGGGGATGAAGctaCCTGGTCCGAgttggtgtgtatgg</u>         | For cloning STTM165/166          |
| STTM165/166 RP <sup>a</sup>    | <u>gAggAgAagAgCCgTTCGGACCAGGtagCTTCA TTCCCCattcttctttagacca</u>      | For cloning STTM165/166          |
| miR165/166 target FP           | ATCCGCCAAGGGATGCTAGT                                                 | For <i>TC21810</i> Real time PCR |
| miR165/166 target RP           | TCGGCTCTAGACCAACCAGG                                                 | For <i>TC21810</i> Real time PCR |
| Stem-loop miR159 <sup>c</sup>  | GTCTCCTCTGGTGCAGGGTCCGAGGTATTC<br>GCACCAGAGGAGAC <u>GAGCTCCCTT</u>   | For stem-loop RT of nbt-miR159   |
| miR159 FP <sup>b</sup>         | GCGGGCG <u>TTTGGATTGAAG</u>                                          | For miR159 Real time PCR         |
| Stem miR159 RP                 | GTGCAGGGTCCGAGGT                                                     | For miR159 Real time PCR         |
| STTM 159 FP <sup>a</sup>       | <u>CgACgACAAgACCgTTAGAGCTCCCTgtgcTCAATCCAAAggttggtgtatgg</u>         | For cloning STTM159              |
| STTM 159 RP <sup>a</sup>       | <u>gAggAgAagAgCCgTTTTGGATTGAgcacAGGGAGCTCTAattcttctttagacca</u>      | For cloning STTM159              |
| miR159 target FP               | CATCACCCATCATCTCCGGT                                                 | For <i>NbMYBL1</i> Real time PCR |
| miR159 target RP               | GACCACTGTTCCGAGGTGAC                                                 | For <i>NbMYBL1</i> Real time PCR |
| eIF4A FP                       | GCTTTGGTCTTGGCACCTACTC                                               | For <i>eIF4A</i> Real time PCR   |
| eIF4A RP                       | TGCTCGCATGACCTTTTCAA                                                 | For <i>eIF4A</i> Real time PCR   |
| 48 nts                         | GTTGTTGTTGTTATGGTCTAATTTAAATATGG<br>TCTAAAGAAGAAGAAT                 | As STTM template                 |

**Supplementary Table S1. Primers Used in Vector Construction and PCR**

<sup>a</sup>, STTM mimic sequence is underlined; <sup>b</sup>, MiRNA sequence is underlined; <sup>c</sup>, Reverse-complement sequence of miRNA is underlined.
